# Supplementary material for: Highly conductive RuO2 thin films from novel facile aqueous chemical solution deposition
Source: Springer Nature journal article supplement (doi:10.1007/s10971-023-06221-8), 2023-09-16
Supplement: MOESM1 [file 26052312]

Supplementary Information

Highly Conductive RuO2 Thin Films from Novel Facile Aqueous Chemical Solution Deposition

Martina Angermann1, Georg Jakopic2, Christine Prietl2, Thomas Griesser3, Klaus Reichmann4, Marco Deluca1

1 Materials Center Leoben Forschung GmbH, Department of Microelectronics, Leoben, Austria (corresponding author: martina.angermann@mcl.at)

2 Joanneum Research Forschungsgesellschaft mbH, Institute for Sensors, Photonics and Manufacturing Technologies

3 Montanuniversität Leoben, Institute of Chemistry of Polymeric Materials

4 Graz University of Technology, Institute for Chemistry and Technology of Materials

TGA measurements coupled with mass spectrometry (MS) were done for the dried solution (200°C) and the precursor salt (ruthenium(III)-nitrosylnitrate). The drastic mass loss between 170°C-320°C from gas evolution (e.g. CO2, NOx, …), which is related to the pyrolysis of the samples, matched the increased ion currents in this temperature range for such gases. Since there is a lot of acetic acid in the solution, but not in the precursor salt, a high gas evolution of CO2 (m/z=44) was only recorded for the dried solution. (see Fig. S1)


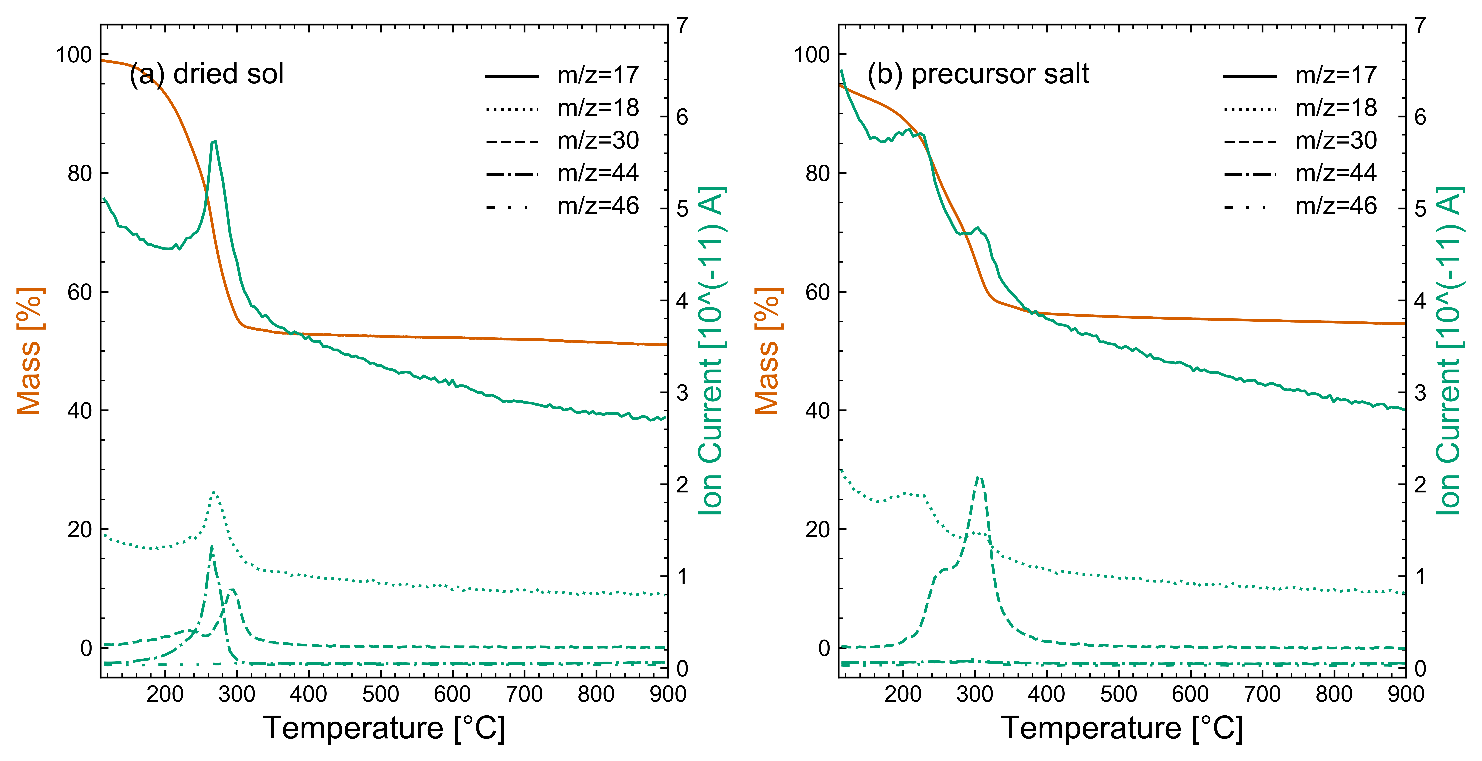


Fig. S1 TGA measurements coupled with MS for the precursor salt and the solution dried at 200°C. The ion currents were associated to the specific gases according to their masses (m/z: 17/18, 30, 44, 46 for H2O, NO, CO2, NO2, respectively)

The influence of the heating rate on the microstructure was also tested by applying slow (0.5 °C/s) and fast heating (10°C/s) to films annealed at 500°C (see Fig. S2). Thin films prepared this way looked very similar, hence the heating rate does not seem to impact the microstructure significantly.


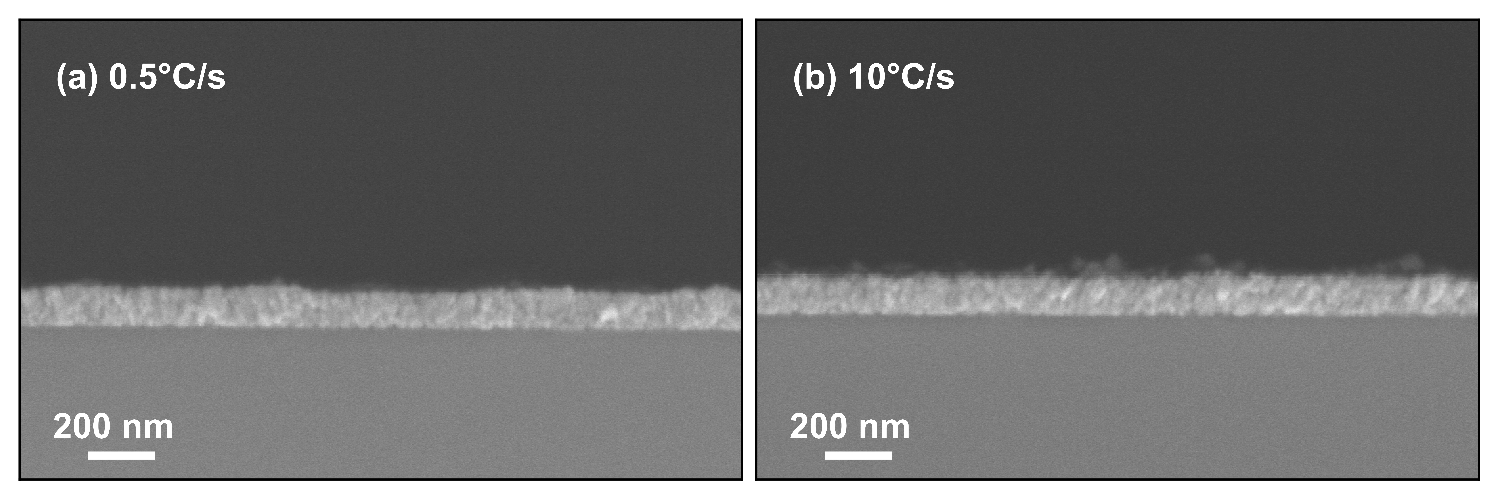


Fig. S2 SEM images of cross-sections of the thin films annealed at 500°C with 0.5°C/s (a) and 10°C/s (b) on top of the silicon substrate

The influence of the precursor solution chemistry on the microstructure can be seen in Fig. S3. A higher amount of acetic acid (1:3, V:V, H20:acetic acid) in the solution leads to a smoother microstructure with well-aligned columnar grains. Hence, the higher burn-out of the organics during pyrolysis did not increase porosity in the thin film and was beneficial to create a smooth and dense layer.


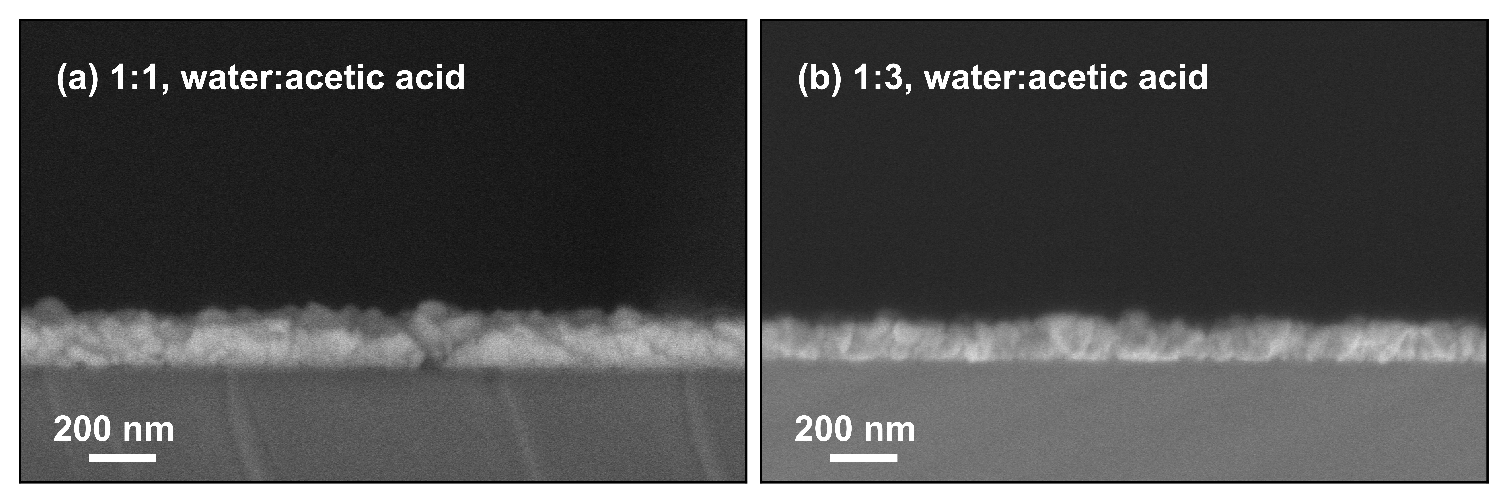


Fig S3 SEM images of cross-sections of the thin films annealed at 600°C from 1:1, V:V, H2O:acetic acid solution (a) 1:3, V:V, H2O:acetic acid solution (b) on top of the silicon substrate

Deriving the optical and dielectric constants from ellipsometry measurements showed that the 220 nm RuO2 thin film on silicon and fused silica have very similar optical properties (see Fig. S4).


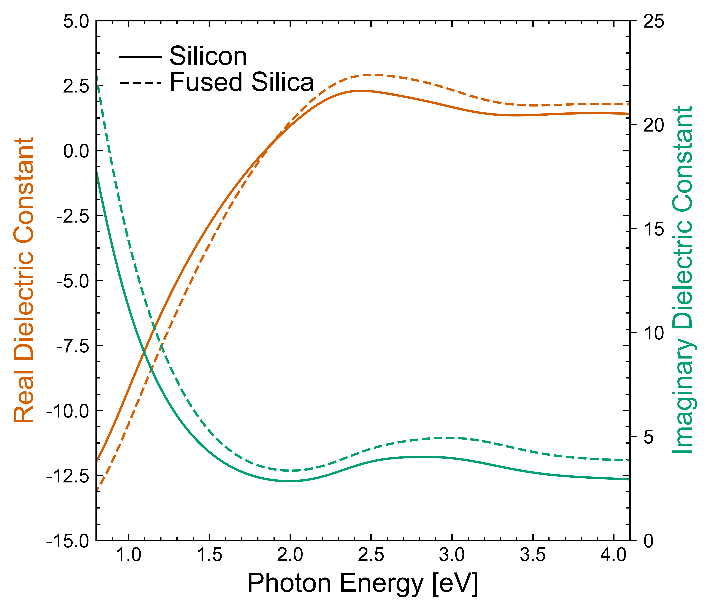


Fig. S4 Dielectric constants of 220 nm thick RuO2 thin films on silicon and fused silica calculated from ellipsometry measurements.
